# Supplementary material for: Meta-analysis of Genome wide Association Studies on Childhood ADHD Symptoms and Diagnosis Reveals 17 Novel Loci and 22 Potential Effector Genes
Source: bioRxiv or medRxiv preprint supplement (doi:10.1101/2024.04.17.24305817), 2024-04-19
Supplement: Supplementary file [file media-3.pdf]

# Meta-analysis of Genome wide Association Studies on Childhood ADHD Symptoms and Diagnosis Reveals 17 Novel Loci and 22 Potential Effector Genes

## **Supplemental Text**

### **Cohort description**

#### *ABCD*

Data for this study comes from the ABCD-Genetic Enrichment (ABCD-GE) study, a sub-study of 1,192 ethnic Dutch children. Approval of the study was obtained from the Central Committee on Research Involving Human Subjects in the Netherlands, the medical ethics review committees of the participating hospitals and the Registration Committee of the Municipality of Amsterdam and written consent was obtained from participating parents and children of the phenotypes. Regarding the DNA collection and analysis, an opt-out procedure was used (METC approval 2002\_039#B2013531).

#### *ALSPAC*

Data for this study were obtained for children of the ALSPAC study, a UK population-based longitudinal pregnancy-ascertained birth cohort (1,2). Pregnant women resident in Avon, UK with expected dates of delivery between 1st April 1991 and 31st December 1992 were invited to take part in the study. 20,248 pregnancies have been identified as being eligible and the initial number of pregnancies enrolled was 14,541. Of the initial pregnancies, there was a total of 14,676 fetuses, resulting in 14,062 live births and 13,988 children who were alive at 1 year of age. The total sample size for analyses using any data collected after the age of seven is 15,447 pregnancies, resulting in 15,658 fetuses. Of these 14,901 children were alive at 1 year of age. Ethical approval was obtained

26 from the ALSPAC Law-and-Ethics Committee (IRB00003312) and the Local Research-Ethics  
27 Committees. Written informed consent was obtained from a parent or individual with parental  
28 responsibility and assent (and for older children consent) was obtained from the child participants.  
29 The study website contains details of all the data that is available through a fully searchable data  
30 dictionary (<http://www.bris.ac.uk/alspac/researchers/data-access/data-dictionary/>).

31

### 32 *BREATHE*

33 Participants were drawn from the BREATHE project (European Commission: FP7-ERC-2010-AdG, ID  
34 268479), a population-based cohort of primary schoolchildren designed to analyze the association  
35 between air pollution and behavior, cognitive function and brain morphology (3). A total of 2897  
36 children aged 7 to 11 years accepted the invitation and participated in the project. Genotype data  
37 were available for 1667 children of European ethnic origin.

38 All parents or legal guardians gave written informed consent, and the study was approved by the  
39 IMIM-Parc de Salut Mar Research Ethics Committee (No. 2010/41221/I), Barcelona, Spain; and the  
40 FP7-ERC-2010-AdG Ethics Review Committee (268479-22022011).

41

### 42 *CATSS/TCHAD*

43 The Child and Adolescent Twin Study in Sweden (CATSS) is an ongoing longitudinal twin study  
44 targeting all twins born in Sweden since July 1, 1992 (4,5). parents of twins are interviewed  
45 regarding the children's somatic and mental health and social environment in connection with their  
46 9th or 12th birthdays

47

### 48 CHDS (GEDI)

49 The New Zealand arm of the Gene-Environment-Development Initiative (GEDI) utilized data from the  
50 Christchurch Health and Development Study, a longitudinal study of the life course development of a  
51 birth cohort of 1265 children born in the Christchurch (New Zealand) urban region in mid-1977 (6–

52 9). For this analysis phenotypic data on childhood inattention/hyperactivity problems gathered via  
53 parental and self-report were combined with gene chip data for a sample of ~740 participants.

54

#### 55 *COGA*

56 The **Collaborative Studies on the Genetics of Alcoholism (COGA)** is an eleven-center research  
57 project in the United States designed to identify and understand the genetic basis of alcoholism.  
58 Research is conducted at University of Connecticut, Indiana University, University of Iowa, SUNY  
59 Downstate Medical Center at Brooklyn, Washington University in St. Louis, University of California at  
60 San Diego, Rutgers University, University of Texas Health Science Center at San Antonio, Virginia  
61 Commonwealth University, Icahn School of Medicine at Mount Sinai, and Howard University.

62

63 COGA investigators have collected data on more than 2,255 extended families in which many  
64 members are affected by alcoholism. The researchers collected extensive clinical,  
65 neuropsychological, electrophysiological, biochemical, and genetic data on the more than 17,702  
66 individuals who are represented in the database. The researchers also have established a repository  
67 of cell lines from these individuals to serve as a permanent source of DNA for genetic studies.

68

#### 69 *COPSAC*

70 The Copenhagen Prospective Studies on Asthma in Childhood is a clinical study with multiple cohorts  
71 (COPSAC2000 and COPAC2010). The COPSAC2010 cohort is a population based prospective mother-  
72 child cohort comprising 700 children born to unselected mothers (during 2009-10) from Zealland,  
73 Denmark. The cohort was enrolled at age 1 week and attended the research clinic for clinical  
74 examinations at ages 1, 3, 6, 9, 12, 18, 24, 30 and 36 month and yearly hereafter till age 8 years. The  
75 Ethics Committee for Copenhagen and the Danish Data Protection Agency approved this study. This  
76 has been described elsewhere (10).

77

78 *Dunedin Study*

79 Participants were members of the Dunedin Multidisciplinary Health and Development Study, a  
80 longitudinal investigation of health and behavior in a representative birth) (11). Study members (n =  
81 1,037; 91% of eligible births; 52% male) were all individuals born between April 1972 and March  
82 1973 in Dunedin, New Zealand, who were eligible for the longitudinal study based on residence in  
83 the province at 3 years of age and who participated in the first follow-up assessment at 3 years of  
84 age. The cohort represented the full range of socioeconomic status on NZ's South Island. On adult  
85 health, the cohort matches the NZ National Health and Nutrition Survey (e.g., BMI, smoking, GP  
86 visits). Cohort members are primarily white; approximately 7% self-identify as having partial non-  
87 Caucasian ancestry, matching the South Island. Assessments were carried out at birth and at ages 3,  
88 5, 7, 9, 11, 13, 15, 18, 21, 26, 32, and 38 years, when 95% of the 1,007 study members still alive took  
89 part. The Dunedin Study was approved by the NZ-HDEC (Health and Disability Ethics Committee) and  
90 informed consent was obtained from all study members.

91

92 *E-Risk*

93 Participants were members of E-Risk, which tracks the development of a 1994-95 birth cohort of  
94 2,232 British children) (12). Briefly, the E-Risk sample was constructed in 1999-2000, when 1,116  
95 families (93% of those eligible) with same-sex 5-year-old twins participated in home-visit  
96 assessments. This sample comprised 56% monozygotic (MZ) and 44% dizygotic (DZ) twin pairs; sex  
97 was evenly distributed within zygoty (49% male). The study sample represents the full range of  
98 socioeconomic conditions in Great Britain, as reflected in the families' distribution on a  
99 neighborhood-level socioeconomic index (ACORN [A Classification of Residential Neighbourhoods],  
100 developed by CACI Inc. for commercial use): 25.6% of E-Risk families live in "wealthy achiever"  
101 neighborhoods compared to 25.3% nationwide; 5.3% vs. 11.6% live in "urban prosperity"  
102 neighborhoods; 29.6% vs. 26.9% in "comfortably off" neighborhoods; 13.4% vs. 13.9% in "moderate

103 means” neighborhoods; and 26.1% vs. 20.7% in “hard-pressed” neighborhoods. E-Risk  
104 underrepresents “urban prosperity” neighborhoods because such households are often childless.

105 Home visits were conducted when participants were aged 5, 7, 10, 12 and most recently, 18  
106 years (93% participation). The Joint South London and Maudsley and the Institute of Psychiatry  
107 Research Ethics Committee approved each phase of the study. Parents gave informed written  
108 consent and twins gave written assent between 5-12 years and then informed written consent at  
109 age 18.

110 At age 18, 2,066 participants were assessed, each twin by a different interviewer. The  
111 average age at the time of assessment was 18.4 years (SD = 0.36); all interviews were conducted  
112 after the 18th birthday.

113

114

#### 115 *FinnTwin12*

116 FinnTwin12 is a population-based cohort of Finnish twins born 1983–1987 that was established to  
117 track health and behavioral habits (13–15). Identified through the Finnish Central Population  
118 Registry, families with twins were contacted and initially enrolled when the twins were ages 11–12  
119 years old (N=5600 twins; 87% response rate). Questionnaires were collected from multiple  
120 informants over time: from the twins themselves at ages 12, 14, and 17; from parents at age 12; and  
121 from teachers at ages 14 and 17. DNA samples (from blood or saliva) for genotyping were taken in  
122 young adulthood (mean age 22 yrs).

123 FinnTwin12 utilizes the 37-item modified Multidimensional Peer Nomination Inventory (MPNI), with  
124 subscales used here being: attentional problems (11 items including 7 items from hyperactivity and 4  
125 items from inattention subscales) (16). Informants who completed the MPNI include the parents at  
126 age 12, a teacher at ages 12 and 14, and self- and co-twin ratings at ages 14 and 17. For each  
127 question, the informant rated the child in question on a scale from 0 (does not fit the child at all) to

128 3 (fits the child very well). By averaging the question responses for each subscale, mean scores were  
129 created. No missing responses were allowed.

130

### 131 *Generation R Study*

132 The Generation R Study is a prospective cohort study from fetal life onwards that included pregnant  
133 women living in Rotterdam, the Netherlands, with an expected delivery date between April 2002  
134 and January 2006 (n = 9,778). The main aim of this study is to identify early environmental and  
135 genetic factors that affect growth, health and development (17). The Generation R Study is  
136 multidisciplinary and both prenatal and postnatal measures have included multiple domains of  
137 growth, health and development. Rotterdam is an ethnically diverse city and this is reflected in the  
138 Generation R participants. Of the enrolled mothers, 42% was of non-Dutch ethnic background,  
139 largely made by mothers from Surinamese (9%), Turkish (7%) and Moroccan (3%) background  
140 (17,18). Data has been collected in children up until the mean age of 10 years, with current on-going  
141 data collection at mean age 13 years. Study protocols were approved by the local ethics committee,  
142 and written informed consent and assent was obtained from all parents and children.

143

### 144 *GINIplus/LISA*

145 The influence of Life-style factors on the development of the Immune System and Allergies in East and  
146 West Germany (LISA) Study is a population based birth cohort study. A total of 3094 healthy, full-term  
147 neonates were recruited between 1997 and 1999 in Munich, Leipzig, Wesel and Bad Honnef. The  
148 participants were not pre-selected based on family history of allergic diseases.

149 A total of 5991 mothers and their newborns were recruited into the German Infant study on the  
150 influence of Nutrition Intervention PLUS environmental and genetic influences on allergy  
151 development (GINIplus) between September 1995 and June 1998 in Munich and Wesel. Infants with  
152 at least one allergic parent and/or sibling were allocated to the interventional study arm investigating  
153 the effect of different hydrolysed formulas for allergy prevention in the first year of life. All children

154 without a family history of allergic diseases and children whose parents did not give consent for the  
155 intervention were allocated to the non-interventional arm. Detailed descriptions of the LISA and  
156 GINIplus studies have been published elsewhere (19,20). DNA was collected at the age 6 and 10 years.  
157 During the 10- and 15-year follow-ups, information on ADHD was collected based on the hyperactivity  
158 / inattention subscale from the strength and difficulties (SDQ) questionnaire. At 10 years, the  
159 questionnaire was administered to the parents and at 15 years, to the participants themselves. For  
160 both studies, approval by the local Ethics Committees and written consent from participants and their  
161 families were obtained.

162

### 163 *GSMS (GEDI)*

164 The Great Smoky Mountains Study is a longitudinal, representative study of 1420 children in 11  
165 predominantly rural counties in Southeastern United States (21,22). Annual assessments on  
166 psychopathology and associated factors were completed on the 1420 children until age 16 (6674  
167 observations of 1420 individuals; 1993 to 2000) and then again at ages 19, 21, 25, and 30 (4556  
168 observations of 1336 participants; 1999 to 2015) for a total of 11,230 total assessments.

169

### 170 *IBG*

171 Two cohort studies supplied information for this project: The Colorado Adoption Project  
172 (<http://ibgwww.colorado.edu/cap/>) and the Colorado Twin Registry  
173 (<https://www.colorado.edu/ibg/research/human-research-studies/colorado-twin-registry>) (23–25).

174

### 175 *INMA*

176 The INMA—Infancia y Medio Ambiente— (Environment and Childhood) Project is a network of birth  
177 cohorts in Spain that aim to study the role of environmental pollutants in air, water and diet during  
178 pregnancy and early childhood in relation to child growth and development  
179 (<http://www.proyectoinma.org/>) (26). The study has been approved by Ethical Committee of each

180 participating centre and written consent was obtained from participating parents. Data for this study  
181 comes from INMA Sabadell subcohort.

182 The study was approved by the Ethical Committee of the Municipal Institute of Medical Investigation  
183 and by the Ethical Committee of the hospitals involved in the study. The pregnant women received  
184 information of the study both written and orally. Their informed consent of the participants was asked  
185 in each of the visits.

186

### 187 *INSchool*

188 The INSchool cohort consist of 3, 557 children from 23 schools in Catalonia (age range: 5-17 years;  
189 mean age: 9.8 years, s.d.=2.9). 57.5% of the participants (n=2,046) were males. They were involved  
190 for screening using the Achenbach System of Empirically Based Assessment (ASEBA) with the Child  
191 Behavior Checklist CBCL/4-18 (completed by parents or surrogates), the Teacher Report Form TRF/5-  
192 18 (completed by teachers and other school staff) and the Youth Self-Report YSR/11-18 (completed  
193 by youths); the Strengths and Difficulties Questionnaire (SDQ) and the Conner's ADHD Rating Scales  
194 (Parents and Teachers). The study was approved by the Clinical Research Ethics Committee (CREC) of  
195 Hospital Universitari Vall d'Hebron, all methods were performed in accordance to the relevant  
196 guidelines and regulations and written informed consent was obtained from participant parents  
197 before inclusion into the study.

198

### 199 *MCTFR*

200 Data for this study comes from the Minnesota Center for Twin and Family Research (MCTFR), which  
201 consists of three cohorts of same-sex twins from the birth years 1971-1979<sup>1</sup>, 1977-1985 (27), and  
202 1988-1994 (28). Approval for all studies was obtained through the University of Minnesota  
203 Institutional Review Board.

204

### 205 *MOBA*

206 The Norwegian Mother, Father and Child Cohort Study (MoBa) is a population-based pregnancy  
207 cohort study conducted by the Norwegian Institute of Public Health (29). Participants were recruited  
208 from all over Norway from 1999-2008. The women consented to participation in 41% of the  
209 pregnancies. The cohort now includes 114.500 children, 95.200 mothers and 75.200 fathers. The  
210 current study is based on version 11 of the quality-assured data files released for research on ADHD.  
211 The establishment of MoBa and initial data collection was based on a license from the Norwegian  
212 Data protection agency and approval from The Regional Committees for Medical and Health  
213 Research Ethics. The MoBa cohort is based on regulations based on the Norwegian Health Registry  
214 Act. The current study was approved by The Regional Committees for Medical and Health Research  
215 Ethics (number 2016/1702).

216

#### 217 *MSUTR*

218 Data for this study comes from the Michigan State University Twin Registry (MSUTR), a large,  
219 population-based twin registry comprised of thousands of twins throughout Michigan, aged 3-55  
220 (current N~31,300) (30) . The overall focus of the MSUTR is on understanding developmental  
221 changes in genetic, environmental, and neurobiological influences on internalizing and externalizing  
222 disorders. Recruitment for the MSUTR is ongoing via the identification of birth records through the  
223 Michigan Department of Health and Human Services (MDHHS). Because birth records are  
224 confidential in Michigan, recruitment packets are mailed directly from MDHHS to eligible twin pairs.  
225 Twins indicating interest in participation via pre-stamped postcards or e-mails/calls to the MSUTR  
226 project office are then contacted by study staff to determine study eligibility and to schedule their  
227 assessments. Participants in the registry complete a family health and demographic questionnaire  
228 via mail. Families are then recruited for one or more of the intensive, in-person studies based on  
229 their answers to relevant items in the registry questionnaire. In-person assessments target a variety  
230 of biological, genetic, and environmental phenotypes, including multi-informant measures of  
231 psychiatric and behavioral phenotypes, census and neighborhood informant reports of twin

232 neighborhood characteristics, buccal swab and salivary DNA samples, assays of adolescent and adult  
233 steroid hormone levels, and/or videotaped interactions of child twin families.  
234 Approval for all studies was obtained through the Michigan State University Institutional Review  
235 Board and the Michigan Department of Health and Human Services Institutional Review Board. All  
236 methods were performed in accordance to relevant guidelines and regulations.

237

#### 238 *MUSP*

239 This study is of 7 223 women recruited early in pregnancy over the period 1981-1983 and the live  
240 singleton children to whom they subsequently gave birth. There were follow-up of the mothers at 5,  
241 14, 21 and 27 years after recruitment. Children were also followed-up in the mothers' questionnaire  
242 and independently at 21 and 30 years of age. The CBCL and YSR were administered to children at 5,  
243 14 and 21 years of age. The CIDI was administered to mothers at 27 years after recruitment and the  
244 children at 21 and 30 years after recruitment. The cohort comprises both mothers (to 27 years after  
245 the birth) and children (to 30 years of age). Three papers describing the recruitment methodology  
246 and sample details have been published (31–33).

247

#### 248 *NFBC1986*

249 Northern Finland Birth Cohort 1986 (NFBC1986) is a prospective longitudinal birth cohort which  
250 included pregnant women with expected date of delivery between July 1985 and June 1986 in the  
251 two Northern most provinces of Finland. In total, 9 432 children were live-born in the cohort(34). At  
252 approximately age 16 years, the cohort members were asked to complete a postal questionnaire,  
253 including the Youth Self-Report (YSR). Items on aggression are used here. At age 16 years blood  
254 samples taken for DNA extraction for 6 266 adolescents attending the clinical examination. All  
255 participants and their parents provided consent to use their data and received Institutional Review  
256 Board approval by University of Oulu, and the Ethics committee of the Ostrobothnia Hospital district.  
257 More information may be found at: <http://www oulu fi/nfbc>.

258

259 *NTR*

260 The Netherlands Twin Register (NTR) is a population-based prospective cohort study which includes  
261 newborn twins and multiples from the Netherlands. Recruitment started with birth year 1986 (35).  
262 NTR data collection has a focus on growth, development, emotional and behavioral problems and  
263 health. Phenotype data on attention problems were collected by surveys, in which parents and  
264 teachers were asked to rate their offspring / pupils' behavior using standardized instruments (36). At  
265 age 14 years and after, twins and their siblings were asked for self-assessments (37). Buccal cells and  
266 blood for DNA isolation were collected in multiple sub-projects (38). More information may be found  
267 at: <http://www.tweelingenregister.org/>.

268 The study was approved by the Central Ethics Committee on Research Involving Human Subjects of  
269 the VU University Medical Centre, Amsterdam, an Institutional Review Board certified by the U.S.  
270 Office of Human Research Protections (IRB number IRB00002991 under Federal-wide Assurance-  
271 FWA00017598; IRB/institute codes, NTR 03-180).

272

273 *QIMR*

274 The QIMR *Retrospective DSM III Conduct Disorder* contribution draws on data from a number of  
275 studies (phenotypic and genotypic) undertaken from the 1980s onward by the Genetic Epidemiology  
276 group at QIMR (QIMR Berghofer Medical Research Institute or QIMRB), with recruitment  
277 predominantly from families with adult twins who registered for research purposes with the  
278 Australian Twin Registry (<https://www.twins.org.au>) [40–42]. Phenotype data were self-report, with  
279 study overlap resolved by using the questionnaire completed at the youngest age. The largest  
280 contributions were from (1) SS1, an interview study of adult twins born before 1964 using the Semi-  
281 Structured Assessment for the Genetics of Alcoholism (SSAGA) instrument (N=4 046 twins used,  
282 conducted 1993-1995) and SP, a follow-up of their spouses (N=584, conducted 1998-1999); (2) Twin-  
283 89, an interview study on personality and drinking habits of the twins born 1964-1972 (N=2 040,

284 conducted 1996-2000); (3) the NIH-funded Nicotine Addiction Genetics (NAG) and three Interactive  
285 *Research Project Grant (IRPG)* interview studies (N=4 017, from both cohorts, conducted 2003-  
286 2005). Closely similar or identical questions approximating the items in the DSM-III CD diagnosis  
287 (testing aggressive and highly anti-social behavior), were scored for all studies and combined into a  
288 14 or 15-item symptom score, rescaled by 15/14 if there were 14 items.

289

290

### 291 *The Raine Study*

292 The Raine Study is a prospective pregnancy cohort where 2900 mothers were recruited between  
293 1989 and 1991 (39). Recruitment took place at Western Australia's major perinatal centre, King  
294 Edward Memorial Hospital, and nearby private practices. Women who had sufficient English  
295 language skills, an expectation to deliver at King Edward Memorial Hospital, and an intention to  
296 reside in Western Australia to allow for future follow-up of their child were eligible for the study.

297 The Raine Study is known to be one of the largest successfully prospective cohorts richly phenotyped  
298 at multiple time points over pregnancy, infancy, childhood adolescence, and young adult (40). The  
299 mothers completed questionnaires regarding their children and the children had physical  
300 examinations at ages 1, 2, 3, 5, 8, 10, 13/14, 17/18, 20, 22, 27, and 28 years.

301

### 302 *TEDS*

303 The Twins Early Development Study (TEDS) is a longitudinal twin study that recruited over 16,000  
304 twin pairs born between 1994 and 1996 in England and Wales through national birth records (41).  
305 More than 10,000 of these families are still involved in study. TEDS was and still is a representative  
306 sample of the population in England and Wales. Rich cognitive and behavioural data have been  
307 collected from the twins from infancy to emerging adulthood with data collection at ages 2, 3, 4, 7,  
308 8, 9, 10, 12, 14, 16, 18, 19 and 21, enabling longitudinal genetically sensitive study designs. Data  
309 have been collected from twins themselves (including extensive web-based cognitive testing), from

310 their parents and teachers, and from the UK National Pupil Database. Genotyped DNA data are  
311 available for 10,346 individuals (who are unrelated except for 3,320 dizygotic co-twins). TEDS data  
312 have contributed to over 400 scientific papers involving more than 140 researchers in 50 research  
313 institutions.

314

#### 315 *TRAILS*

316 Tracking Adolescents' Individual Lives Survey (TRAILS) is a large prospective population study of  
317 Dutch adolescents with bi- or triennial measurements from age 11 years onwards. TRAILS  
318 participants were selected from five municipalities in the Northern part of the Netherlands (42). The  
319 cohort's characteristics and database are described in detail elsewhere (43) and at  
320 <http://www/trails.nl/>. DNA was extracted from blood samples or (in a few cases) buccal swaps,  
321 collected at about age 16. In total, 1491 children of white European descent were genotyped. The  
322 study was approved by the Dutch Central Committee on Research Involving Human subjects  
323 (CCMO), and all measurements were carried out with participants' adequate understanding and  
324 written consent.

325

#### 326 VTSABD (GEDI)

327 The VCU arm of the NIDA-funded Gene-Environment-Development Initiative (GEDI) combined  
328 existing phenotypic and environmental data from the Virginia Twin Study of Adolescent Behavioral  
329 Development (VTSABD) study, a population-based multi-wave, cohort-sequential twin study of  
330 adolescent psychopathology and its risk factors, with genome-wide genotyping, generating a  
331 genotyped sample of ~900 subjects (9,44–47).

332

333

334

335

336 **Acknowledgment and Funding**

337 This work is supported by the "Aggression in Children: Unraveling gene-environment interplay to  
338 inform Treatment and InterventiON strategies" (ACTION) project. ACTION receives funding from the  
339 European Union Seventh Framework Program (FP7/2007-2013) under grant agreement no 602768.  
340 Marijn Schipper was funded by NWO Gravitation: BRAINSCAPES: A Roadmap from  
341 Neurogenetics to Neurobiology (Grant No. 024.004.012).

342

343 *ABCD*

344 We thank all participating hospitals, obstetric clinics, general practitioners and primary schools for  
345 their assistance in implementing the ABCD study. We also gratefully acknowledge all the women and  
346 children who participated in this study for their cooperation.

347 The ABCD study has been supported by grants from The Netherlands Organisation for Health  
348 Research and Development (ZonMW) and Sarphati Amsterdam. Genotyping was funded by the  
349 BBMRI-NL grant CP2013-50. Dr M.H. Zafarmand was supported by BBMRI-NL (CP2013-50). Dr.  
350 T.G.M. Vrijkotte was supported by ZonMW (TOP 40-00812-98-11010).

351

352 *ALSPAC*

353 We are extremely grateful to all the families who took part in this study, the midwives for their help  
354 in recruiting them, and the whole ALSPAC team, which includes interviewers, computer and  
355 laboratory technicians, clerical workers, research scientists, volunteers, managers, receptionists and  
356 nurses. GWAS data was generated by Sample Logistics and Genotyping Facilities at Wellcome Sanger  
357 Institute and LabCorp (Laboratory Corporation of America) using support from 23andMe.

358

359 The UK Medical Research Council and Wellcome (Grant ref: 217065/Z/19/Z) and the University of  
360 Bristol provide core support for ALSPAC. This publication is the work of the authors and Beate St  
361 Pourcain and George D. Smith will serve as guarantors for the contents of this paper. A

362 comprehensive list of grants funding is available on the ALSPAC website  
363 (<http://www.bristol.ac.uk/alspac/external/documents/grant-acknowledgements.pdf>). GDS works  
364 within the MRC Integrative Epidemiology Unit at the University of Bristol, which is supported by the  
365 Medical Research Council (MC\_UU\_00032/01). BSTP is supported through Max Planck Society core  
366 funding and the Simons Foundation (514787).

367

#### 368 *BREATHE*

369 We acknowledge all the families and schools participating in the study. The research leading to these  
370 results has received funding from the European Research Council under the ERC Grant Agreement  
371 number 268479 – the BREATHE project. ISGlobal is a member of the CERCA Programme, Generalitat  
372 de Catalunya. We thank the La Caixa Foundation for their financial support in the PAHs analyses. S.  
373 Alemany is funded by avJuan de la Cierva – Incorporación Postdoctoral Contract from Ministerio de  
374 Economía, Industria y Competitividad (IJCI-2017-34068).

375

#### 376 *CATSS*

377 The Child and Adolescent Twin Study in Sweden study was supported by the Swedish Council  
378 for Working Life, funds under the ALF agreement, the Söderström Königska Foundation and the  
379 Swedish Research Council (Medicine, Humanities and Social Science; grant number 2017-02552, and  
380 SIMSAM).

381

#### 382 *CHDS (GEDI)*

383 The Christchurch Health and Development Study has been supported by funding from the Health  
384 Research Council of New Zealand, the National Child Health Research Foundation (Cure Kids), the  
385 Canterbury Medical Research Foundation, the New Zealand Lottery Grants Board, the University of  
386 Otago, the Carney Centre for Pharmacogenomics, the James Hume Bequest Fund, US National  
387 Institutes of Health grant MH077874 and National Institute on Drug Abuse grant R01DA024413.

388

389 *COGA*

390 The Collaborative Study on the Genetics of Alcoholism (COGA), Principal Investigators B. Porjesz, V.  
391 Hesselbrock, H. Edenberg, L. Bierut, includes eleven different centers: University of Connecticut (V.  
392 Hesselbrock); Indiana University (H.J. Edenberg, J. Nurnberger Jr., T. Foroud); University of Iowa (S.  
393 Kuperman, J. Kramer); SUNY Downstate (B. Porjesz); Washington University in St. Louis (L. Bierut, J.  
394 Rice, K. Bucholz, A. Agrawal); University of California at San Diego (M. Schuckit); Rutgers University (J.  
395 Tischfield, A. Brooks); Department of Biomedical and Health Informatics, The Children's Hospital of  
396 Philadelphia; Department of Genetics, Perelman School of Medicine, University of Pennsylvania,  
397 Philadelphia PA (L. Almasy), Virginia Commonwealth University (D. Dick), Icahn School of Medicine at  
398 Mount Sinai (A. Goate), and Howard University (R. Taylor). Other COGA collaborators include: L. Bauer  
399 (University of Connecticut); J. McClintick, L. Wetherill, X. Xuei, Y. Liu, D. Lai, S. O'Connor, M. Plawecki,  
400 S. Lourens (Indiana University); G. Chan (University of Iowa; University of Connecticut); J. Meyers, D.  
401 Chorlian, C. Kamarajan, A. Pandey, J. Zhang (SUNY Downstate); J.-C. Wang, M. Kapoor, S. Bertelsen  
402 (Icahn School of Medicine at Mount Sinai); A. Anokhin, V. McCutcheon, S. Saccone (Washington  
403 University); J. Salvatore, F. Aliev, B. Cho (Virginia Commonwealth University); and Mark Kos (University  
404 of Texas Rio Grande Valley). A. Parsian and M. Reilly are the NIAAA Staff Collaborators.

405

406 We continue to be inspired by our memories of Henri Begleiter and Theodore Reich, founding PI and  
407 Co-PI of COGA, and also owe a debt of gratitude to other past organizers of COGA, including Ting-Kai  
408 Li, P. Michael Conneally, Raymond Crowe, and Wendy Reich, for their critical contributions. This  
409 national collaborative study is supported by NIH Grant U10AA008401 from the National Institute on  
410 Alcohol Abuse and Alcoholism (NIAAA) and the National Institute on Drug Abuse (NIDA), the NIH K02  
411 Award to Dr. Danielle Dick K02 AA018755 from the National Institute on Alcohol Abuse and  
412 Alcoholism (NIAAA).

413

414 *COPSAC*

415 All funding received by COPSAC is listed on [www.copsac.com](http://www.copsac.com). The Lundbeck Foundation (Grant no  
416 R16-A1694); The Ministry of Health (Grant no 903516); Danish Council for Strategic Research (Grant  
417 no 0603-00280B) and The Capital Region Research Foundation have provided core support to the  
418 COPSAC research center. We express our deepest gratitude to the children and families of the  
419 COPSAC 2010 cohort study for all their support and commitment. We acknowledge and appreciate  
420 the unique efforts of the COPSAC research team.

421

422 *Dunedin*

423 We thank the Dunedin Study members and their parents, Unit research staff, and Study founder Phil  
424 Silva. The Dunedin Longitudinal Study is funded by the New Zealand Health Research Council, the  
425 New Zealand Ministry of Business, Innovation, and Employment (MBIE), the National Institute on  
426 Aging (AG032282), and the Medical Research Council (MR/P005918/1). Additional support was  
427 provided by the Jacobs Foundation and the Avielle Foundation. This work used a high-performance  
428 computing facility partially supported by grant 2016-IDG-1013 (“HARDAC+: Reproducible HPC for  
429 Next-generation Genomics”) from the North Carolina Biotechnology Center.

430

431 *E-Risk*

432 We are grateful to the study mothers and twins for their participation, and to members of the E-Risk  
433 team for their dedication, hard work, and insights. The E-Risk Study is funded by the Medical  
434 Research Council (G1002190) and the National Institute of Child Health and Human Development  
435 (HD077482). Additional support was provided by the Jacobs Foundation. This work used a high-  
436 performance computing facility partially supported by grant 2016-IDG-1013 (“HARDAC+:  
437 Reproducible HPC for Next-generation Genomics”) from the North Carolina Biotechnology Center.

438

439 LA is appointed Mental Health Leadership Fellow for the UK Economic and Social Research Council  
440 (ESRC)

441

442 *FinnTwin*

443 Data collection has been supported by the National Institute of Alcohol Abuse and Alcoholism  
444 (Grants AA-12502, AA-00145, and AA-09203 to RJR) and the Academy of Finland (Grants 100499,  
445 205585, 118555, 141054, 265240, 263278 and 264146 to JK). JK has been supported by the Academy  
446 of Finland (Grant 312073). We wish to sincerely thank all of the twins and their families, school  
447 principals, and teachers who participated in the FinnTwin12 study, and the FinnTwin12 data  
448 collection staff for all their hard work

449

450 *Generation R Study*

451 This work was supported by the Dutch Ministry of Education, Culture and Science (Gravity Grant No.  
452 024.001.003, Consortium on Individual Development), and the Netherlands Organisation for  
453 Scientific Research (NWO-grant 016.VICI.170.200) to HT. The first phase of the Generation R Study is  
454 made possible by financial support from the Erasmus Medical Centre, Rotterdam; the Erasmus  
455 University Rotterdam; and the Netherlands Organisation for Health Research and Development  
456 (ZonMw). The authors gratefully acknowledge the contribution of all children and parents, general  
457 practitioners, hospitals, midwives and pharmacies involved in the Generation R Study. The  
458 Generation R Study is conducted by the Erasmus Medical Centre (Rotterdam) in close collaboration  
459 with the School of Law and Faculty of Social Sciences of the Erasmus University Rotterdam; the  
460 Municipal Health Service Rotterdam area, Rotterdam; the Rotterdam Homecare Foundation,  
461 Rotterdam; and the Stichting Trombosedienst & Artsenlaboratorium Rijnmond, Rotterdam.

462

463 *GINIplus/LISA*

464 The authors thank all families for participation in the studies and the LISA and GINIplus study teams  
465 for their excellent work.

466

467 GSMS (GEDI)

468 This research was supported by the National Institute on Drug Abuse (U01DA024413, R01DA11301),  
469 the National Institute of Mental Health (R01MH063970, R01MH063671, R01MH048085,  
470 K01MH093731 and K23MH080230), NARSAD, and the William T. Grant Foundation. We are grateful  
471 to all the GSMS and CCC study participants who contributed to this work.

472

473 *IBG*

474 Funding for genotyping, analytic support, and data curation supported by NIH R01 AG046938 and  
475 P60 DA011015. Dr. Hopfer reports support from DA032555, DA035804, and DA042755.

476

477 *INMA*

478 INMA researchers would like to thank all the participants for their generous collaboration. This work  
479 was supported by grants from the European Union [FP7-ENV-2011 cod 282957 and  
480 HEALTH.2010.2.4.5-1] and from Spain: Instituto de Salud Carlos III [Red INMA G03/176,  
481 CB06/02/0041, FIS-FEDER: PI03/1615, PI041436, PI04/1509, PI04/1112, PI04/1931, PI05/1079,  
482 PI05/1052, PI06/0867, PI06/1213, PI07/0314, PI081151, PI09/02647, PI09/00090, PI11/01007,  
483 PI11/02591, PI11/02038, PI12/01890, PI13/1944, PI13/2032, PI14/00891, PI14/01687, PI16/1288,  
484 and PI17/00663; Miguel Servet-FEDER CP11/0178, MS16/00128, and MSII16/00051; and PFIS-  
485 FI14/00099], Alicia Koplowitz Foundation 2017, Generalitat Valenciana [FISABIO-UGP 15-230, 15-  
486 244, and 15-249], Department of Health of the Basque Government [2005111093 and 2009111069],  
487 the Provincial Government of Gipuzkoa [DFG06/004 and DFG08/001], and the Generalitat de  
488 Catalunya-CIRIT [1999SGR 00241].

489

490 *INSchool*

491 We are grateful to all the families and schools who kindly participated in the study. This work was  
492 funded by the Instituto de Salud Carlos III (PI16/01505 and PI17/00289), and co-financed by the  
493 European Regional Development Fund (ERDF), Agència de Gestió d'Ajuts Universitaris i de Recerca-  
494 AGAUR, Generalitat de Catalunya, Spain (2014SGR1357, 2017SGR1461), the Health Research and  
495 Innovation Strategy Plan (PERIS SLT006/17/285 and PERIS SLT006/17/287), Generalitat de Catalunya,  
496 Spain, la Fundació Bancària "La Caixa", els Departaments de Salut i d'Educació, Generalitat de  
497 Catalunya, Spain, les Diputacions de Barcelona i Lleida, Spain, the European College of  
498 Neuropsychopharmacology (ECNP network: 'ADHD across the lifespan') and a NARSAD Young  
499 Investigator Grant from the Brain & Behavior Research Foundation. The research leading to these  
500 results has received funding from the European Union Seventh Framework Program (FP72007-2013)  
501 under grant agreement No 602805 and from the European Union H2020 Programme (H2020/2014-  
502 20) under grant agreements Nos. 667302 (CoCA) and 728018 (Eat2BeNICE). Over the course of this  
503 investigation, M. Ribases was a recipient of a Miguel de Servet contract from the Instituto de Salud  
504 Carlos III, Spain (CP09/00119 and CPII15/ 00023), P. Rovira was a recipient of a pre-doctoral  
505 fellowship from the Agència de Gestió d'Ajuts Universitaris i de Recerca (AGAUR), Generalitat de  
506 Catalunya, Spain (2016FI\_B 00899), C. Sánchez-Mora was a recipient of a Sara Borrell contract and a  
507 mobility grant from the Spanish Ministerio de Economía y Competitividad, Instituto de Salud CarlosIII  
508 (CD15/00199 and MV16/00039) and M. Soler Artigas was a recipient of a contract from the  
509 Biomedical Network Research Center on Mental Health (CIBERSAM), Madrid, Spain.

510

511 M.C. has received travel grants and research support from Eli Lilly and Co., Janssen-Cilag, Shire and  
512 Lundbeck and served as consultant for Eli Lilly and Co., Janssen-Cilag, Shire and Lundbeck.

513

514 *MCTFR*

515 MCTFR research is supported by grants from the National Institute on Drug Abuse (R37 DA005147,  
516 R01 DA013240, R01 DA036216, and U01 DA024417), the National Institute on Alcohol Abuse and  
517 Alcoholism (R37 AA009367 and R01 AA011886), and the National Institute of Mental Health (R01  
518 MH066140).

519

520 MoBa

521 We thank the Norwegian Institute of Public Health (NIPH) for generating high-quality genomic data.  
522 This research is part of the HARVEST collaboration, supported by the Norwegian Research Council  
523 (grant # 229624).

524

525 The Norwegian Mother and Child Cohort Study are supported by the Norwegian Ministry of Health  
526 and Care Services and the Ministry of Education and Research, NIH/NIEHS (contract no N01-ES-  
527 75558), NIH/NINDS (grant no.1 U01 NS 047537-01 and grant no.2 U01 NS 047537-06A1). We are  
528 grateful to all the participating families in Norway who take part in this on-going cohort study.

529

530 We thank the Center for Diabetes Research, the University of Bergen for providing genotype data  
531 funded by the ERC AdG project SELECTIONPREDISPOSED, Stiftelsen Kristian Gerhard Jebsen, Trond  
532 Mohn Foundation, the Research Council of Norway, the Novo Nordisk Foundation, the University of  
533 Bergen, and the Western Norway health Authorities (Helse Vest).

534

535 The analyses of the data were supported by Stiftelsen Kristian Gerhard Jebsen (grant number SKGJ-  
536 MED-002) and by NIH/NIMH (grant number 5U01MH109539-03).

537

538 *MSUTR*

539 This research was supported by the National Institute of Mental Health (NIMH) under Award  
540 Number R01-MH081813 and the Eunice Kennedy Shriver National Institute for Child Health and  
541 Human Development (NICHD) under Award Number R01-HD066040

542

543 This research was supported by the National Institute on Drug Abuse under Award Number  
544 R01DA043501 and the National Library of Medicine under Award Number R01LM012848

545

546 *MUSP*

547 This study was funded by grants received from the National Health and Medical Research Council  
548 (NHMRC) and Australian Research Council (ARC). Thanks also to Shelby Marrington (Project  
549 Manager) and Greg Shuttlewood (Data Manager) who have supervised the day-to-day management  
550 of the study. We also extend our thanks to the mothers and children who have continued to  
551 participate in the study.

552 JGS is supported by a National Health and Medical Research Council Practitioner Fellowship Grant  
553 APP1105807

554 The authors thank the MUSP study participants and study team. The authors thank the National  
555 Health and Medical Research Council (NHMRC).

556

557 *NFBC1986*

558 We thank all cohort members and researchers who have participated in the study. We also wish to  
559 acknowledge the work of the NFBC project center. NFBC1986 has received funding from: EU QLGI-  
560 CT-2000-01643 (EUROBLCS) Grant no. E51560, NorFA Grant no. 731, 20056, 30167, USA / NIH 2000  
561 G DF682 Grant no. 50945, the EU H2020-MSCA-ITN-2016 CAPICE Action Grant no. 721567. Academy  
562 of Finland EGEA project (285547), EU H2020 LifeCycle Action (grant agreement No 733206), and  
563 DynaHEALTH action (grant agreements No. 633595). The DNA extractions, sample quality controls,

564 biobank upkeep and aliquoting were performed in the National Public Health Institute, Biomedicum  
565 Helsinki, Finland and supported financially by the Academy of Finland and Biocentrum Helsinki.

566

567 *NTR*

568 Funding was obtained from multiple grants from the Netherlands Organization for Scientific  
569 Research (NWO) and The Netherlands Organisation for Health Research and Development (ZonMW):  
570 Genetic influences on stability and change in psychopathology from childhood to young adulthood  
571 (ZonMw 912-10-020); Twin family database for behavior genomics studies (NWO 480-04-004);  
572 Genetic and Family Influences on Adolescent. Psychopathology and Wellness (NWO 463-06-001); A  
573 Twin-Sibling Study of Adolescent Wellness (451-04-034). Twin research focusing on behavior (NWO  
574 400-05-717); Longitudinal data collection from teachers of Dutch twins and their siblings (481-08-  
575 011), Twin-family-study of individual differences in school achievement (NWO-FES, 056-32-010),  
576 Genotype/phenotype database for behavior genetic and genetic epidemiological studies (ZonMw  
577 Middelgroot 911-09-032); “Why some children thrive” (OCW\_Gravity program –NWO-024.001.003),  
578 Netherlands Twin Registry Repository: researching the interplay between genome and environment  
579 (NWO-Groot 480-15-001/674); BBMRI –NL (184.021.007 and 184.033.111): Biobanking and  
580 Biomolecular Resources Research Infrastructure; Spinozapremie (NWO- 56-464-14192) and KNAW  
581 Academy Professor Award (PAH/6635) to DIB ; the Neuroscience Campus Amsterdam (NCA) and  
582 Amsterdam Public Health (APH); the European Science Council (ERC) Genetics of Mental Illness (ERC  
583 Advanced, 230374); NIH: Rutgers University Cell and DNA Repository cooperative agreement (NIMH  
584 U24 MH068457-06); Developmental Study of Attention Problems in Young Twins (NIMH, RO1  
585 MH58799-03); Grand Opportunity grant Developmental trajectories of psychopathology (NIMH 1RC2  
586 MH089995) and the Avera Institute for Human Genetics.

587

588 *QIMR*

589 Phenotype and genotype collection was funded by the National Health and Medical Research  
590 Council (including grants APP1103603, 241944, 339462, 389927,389875, 389891, 389892, 389938,  
591 442915, 442981, 496739, 552485,and 552498); by the Australian Research Council (including grants  
592 A7960034, A79906588, A79801419, DP0770096, DP0212016, and DP0343921), and National  
593 Institutes of Health (including grants AA013320, AA013321, AA013326, AA011998 and AA017688).  
594 The authors acknowledge the extensive work carried out by current and former QIMRB staff,  
595 particularly the current QIMRB Sample Processing facility (formerly Molecular Epidemiology lab) for  
596 sample processing; former interviewers, IT and project staff for recruitment and data collection; and  
597 the use of the QIMRB High Performance Computing facility for data storage and analysis. SEM is  
598 supported by an NHMRC Senior Research Fellowship (APP1103623) LC-C is supported by a QIMR  
599 Berghofer Fellowship.

600

#### 601 *The Raine Study*

602 The Raine Study was supported by the National Health and Medical Research Council of Australia  
603 [Grant Numbers 572613, 403981, 1059711, 211912, 003209], and the Canadian Institutes of Health  
604 Research [Grant Number MOP-82893]. The authors are grateful to the Raine Study participants and  
605 their families, and to the Raine Study team for cohort coordination and data collection. The authors  
606 gratefully acknowledge the NHMRC for their long-term funding to the study over the last 30 years  
607 and also the following institutes for providing funding for Core Management of the Raine Study: The  
608 University of Western Australia (UWA), Curtin University, Women and Infants Research Foundation,  
609 Telethon Kids Institute, Edith Cowan University, Murdoch University, The University of Notre Dame  
610 Australia and The Raine Medical Research Foundation. This work was supported by resources  
611 provided by the Pawsey Supercomputing Centre with funding from the Australian Government and  
612 Government of Western Australia.

613

#### 614 *TCHAD*

615 The Swedish Twin study of Child and Adolescent Development (TCHAD) was supported by the  
616 Swedish Council for Working Life and the Swedish Research Council (Medicine and SIMSAM).

617

618 *TEDS*

619 We gratefully acknowledge the ongoing contribution of the participants in the Twins Early  
620 Development Study (TEDS) and their families. TEDS is supported by a program grant to RP from the  
621 UK Medical Research Council (MR/M021475/1 and previously G0901245), with additional support  
622 from the US National Institutes of Health (AG046938). RP is supported by a Medical Research Council  
623 Professorship award (G19/2).

624

625 *TRAILS*

626 TRAILS (TRacking Adolescents' Individual Lives Survey) is a collaborative project involving various  
627 departments of the University Medical Center and University of Groningen, the University of  
628 Utrecht, the Radboud Medical Center Nijmegen, and the Parnassia Bavo group, all in the  
629 Netherlands. TRAILS has been financially supported by grants from the Netherlands Organization for  
630 Scientific Research NWO (Medical Research Council program grant GB-MW 940-38-011; ZonMW  
631 Brainpower grant 100-001-004; ZonMw Risk Behavior and Dependence grant 60-60600-97-118;  
632 ZonMw Culture and Health grant 261-98-710; Social Sciences Council medium-sized investment  
633 grants GB-MaGW 480-01-006 and GB-MaGW 480-07-001; Social Sciences Council project grants GB-  
634 MaGW 452-04-314 and GB-MaGW 452-06-004; NWO large-sized investment grant  
635 175.010.2003.005; NWO Longitudinal Survey and Panel Funding 481-08-013 and 481-11-001; NWO  
636 Vici 016.130.002 and 453-16-007/2735; NWO Gravitation 024.001.003); the Dutch Ministry of Justice  
637 (WODC), the European Science Foundation (EuroSTRESS project FP-006), the European Research  
638 Council (ERC-2017-STG-757364 en ERC-CoG-2015-681466), Biobanking and Biomolecular Resources  
639 Research Infrastructure BBMRI-NL (CP 32), the Gratama foundation, the Jan Dekker foundation, the  
640 participating universities, and Accare Center for Child and Adolescent Psychiatry.

641

642 We are grateful to all adolescents, their parents and teachers who participated in this research and  
643 to everyone who worked on this project and made it possible. Statistical analyses were carried out  
644 on the Genetic Cluster Computer (<http://www.geneticcluster.org>), which is financially supported by  
645 the Netherlands Scientific Organization (NWO 480-05-003) along with a supplement from the Dutch  
646 Brain Foundation.

647

648 VTSABD (GEDI)

649 This research was supported by the National Institute on Drug Abuse (U01DA024413,  
650 R01DA025109), the National Institute of Mental Health (R01MH045268, R01MH068521). We are  
651 grateful to all the VTSABD study participants who contributed to this work.

652

653

## 654 **Supplementary Methods**

### 655 **eQTL datasets in FUMA used for gene-mapping**

656 BrainSeq\_ge\_brain.txt.gz PsychENCODE/PsychENCODE\_eQTLs.txt.gz CMC/CMC\_SV A\_cis.txt.gz  
657 CMC/CMC\_SV A\_trans.txt.gz  
658 CMC/CMC\_NoSV A\_cis.txt.gz  
659 CMC/CMC\_NoSV A\_trans.txt.gz BRAINEAC/CRBL.txt.gz  
660 BRAINEAC/FCTX.txt.gz  
661 BRAINEAC/HIPP .txt.gz  
662 BRAINEAC/MEDU.txt.gz  
663 BRAINEAC/OCTX.txt.gz  
664 BRAINEAC/PUTM.txt.gz  
665 BRAINEAC/SNIG.txt.gz  
666 BRAINEAC/TCTX.txt.gz  
667 BRAINEAC/THAL.txt.gz  
668 BRAINEAC/WHMT.txt.gz  
669 BRAINEAC/aveALL.txt.gz GTEX/v8/Brain\_Amygdala.txt.gz  
670 GTEX/v8/Brain\_Anterior\_cingulate\_cortex\_BA24.txt.gz GTEX/v8/Brain\_Caudate\_basal\_ganglia.txt.gz  
671 GTEX/v8/Brain\_Cerebellar\_Hemisphere.txt.gz GTEX/v8/Brain\_Cerebellum.txt.gz  
672 GTEX/v8/Brain\_Cortex.txt.gz GTEX/v8/Brain\_Frontal\_Cortex\_BA9.txt.gz  
673 GTEX/v8/Brain\_Hippocampus.txt.gz GTEX/v8/Brain\_Hypothalamus.txt.gz  
674 GTEX/v8/Brain\_Nucleus\_accumbens\_basal\_ganglia.txt.gz  
675 GTEX/v8/Brain\_Putamen\_basal\_ganglia.txt.gz GTEX/v8/Brain\_Spinal\_cord\_cervical\_c-1.txt.gz  
676 GTEX/v8/Brain\_Substantia\_nigra.txt.gz

677

### 678 **Chromatin interaction datasets in FUMA used for gene mapping**

679 EP/PsychENCODE/EP\_links\_oneway.txt.gz: HiC/PsychENCODE/Promoter\_anchored\_loops.txt.gz:  
680 HiC/Giusti-Rodriguez\_et\_al\_2019/Adult\_Cortex.txt.gz: HiC/Giusti-  
681 Rodriguez\_et\_al\_2019/Fetal\_Cortex.txt.gz: HiC/GSE87112/Dorsolateral\_Prefrontal\_Cortex.txt.gz  
682 HiC/GSE87112/Hippocampus.txt.gz Roadmap – brain:  
683 E053:E054:E067:E068:E069:E070:E071:E072:E073:E074:E081:E082  
684

### 685 **Gene-sets used in FUMA hypergeometric gene-set tests**

686 Differentially Expressed Gene (DEG) Set - GTEX v8 specific tissue types  
687 Differentially Expressed Gene (DEG) Set - GTEX v8 general tissue types  
688 Differentially Expressed Gene (DEG) Set - Brainspan 11 developmental stages  
689 Differentially Expressed Gene (DEG) Set - Brainspan 29 ages of brain samples  
690 Hallmark gene sets (MsigDB h) - h.all.v2023.1.Hs.entrez.gmt  
691 Positional gene sets (MsigDB c1) - c1.all.v2023.1.Hs.entrez.gmt  
692 Curated\_gene\_sets - c2.all.v2023.1.Hs.entrez.gmt  
693 Chemical and Genetic perturbation gene sets (MsigDB c2) - c2.cgp.v2023.1.Hs.entrez.gmt  
694 All Canonical Pathways (MsigDB c2) - c2.cp.v2023.1.Hs.entrez.gmt  
695 BioCarta (MsigDB c2) - c2.cp.biocarta.v2023.1.Hs.entrez.gmt  
696 KEGG (MsigDB c2) - c2.cp.kegg.v2023.1.Hs.entrez.gmt  
697 Reactome (MsigDB c2) - c2.cp.reactome.v2023.1.Hs.entrez.gmt  
698 microRNA targets (MsigDB c3) - c3.mir.v2023.1.Hs.entrez.gmt  
699 TF targets (MsigDB c3) - c3.tft.v2023.1.Hs.entrez.gmt  
700 All computational gene sets (MsigDB c4) - c4.all.v2023.1.Hs.entrez.gmt

701 Cancer gene neighborhoods (MsigDB c4) - c4.cgn.v2023.1.Hs.entrez.gmt  
702 Cancer gene modules (MsigDB c4) - c4.cm.v2023.1.Hs.entrez.gmt  
703 GO biological processes (MsigDB c5) - c5.go.bp.v2023.1.Hs.entrez.gmt  
704 GO cellular components (MsigDB c5) - c5.go.cc.v2023.1.Hs.entrez.gmt  
705 GO molecular functions (MsigDB c5) - c5.go.mf.v2023.1.Hs.entrez.gmt  
706 Oncogenic signatures (MsigDB c6) - c6.all.v2023.1.Hs.entrez.gmt  
707 Immunologic signatures (MsigDB c7) - c7.all.v2023.1.Hs.entrez.gmt  
708 WikiPathways - c2.cp.wikipathways.v2023.1.Hs.entrez.gmt  
709 Cell\_type\_signature (MSigDB c8) - c8.all.v2023.1.Hs.entrez.gmt  
710

711 **SynGO Settings**

712 The "brain expressed" background set was selected, which contains 18035 unique genes in total of  
713 which 1591 overlap with SynGO annotated genes.  
714 SynGO dataset version: 20231201

715 **References**

- 716 1. Fraser A, Macdonald-Wallis C, Tilling K, Boyd A, Golding J, Davey Smith G, *et al.* (2013): Cohort  
717 Profile: The Avon Longitudinal Study of Parents and Children: ALSPAC mothers cohort. *Int J*  
718 *Epidemiol* 42: 97–110.
- 719 2. Boyd A, Golding J, Macleod J, Lawlor DA, Fraser A, Henderson J, *et al.* (2013): Cohort Profile: The  
720 ‘Children of the 90s’—the index offspring of the Avon Longitudinal Study of Parents and  
721 Children. *Int J Epidemiol* 42: 111–127.
- 722 3. Sunyer J, Esnaola M, Alvarez-Pedrerol M, Fornis J, Rivas I, López-Vicente M, *et al.* (2015):  
723 Association between Traffic-Related Air Pollution in Schools and Cognitive Development in  
724 Primary School Children: A Prospective Cohort Study ((B. P. Lanphear, editor)). *PLOS Med* 12:  
725 e1001792.
- 726 4. Anckarsäter H, Lundström S, Kollberg L, Kerekes N, Palm C, Carlström E, *et al.* (2011): The Child  
727 and Adolescent Twin Study in Sweden (CATSS). *Twin Res Hum Genet* 14: 495–508.
- 728 5. Lichtenstein P, Tuvblad C, Larsson H, Carlström E (2007): The Swedish Twin study of Child and  
729 Adolescent Development: The TCHAD-Study. *Twin Res Hum Genet* 10: 67–73.
- 730 6. Fergusson DM, Horwood JL (2001): The Christchurch Health and Development Study: Review of  
731 Findings on Child and Adolescent Mental Health. *Aust New Zeal J Psychiatry* 35: 287–296.
- 732 7. Fergusson DM, Horwood LJ (2013): The Christchurch Health and Development Study. *The*  
733 *Christchurch Experience: 40 Years of Research and Teaching*. Christchurch: University of Otago,  
734 pp 79–87.
- 735 8. Adkins DE, Clark SL, Copeland WE, Kennedy M, Conway K, Angold A, *et al.* (2015): Genome-Wide  
736 Meta-Analysis of Longitudinal Alcohol Consumption Across Youth and Early Adulthood. *Twin*  
737 *Res Hum Genet* 18: 335–347.
- 738 9. Costello EJ, Eaves L, Sullivan P, Kennedy M, Conway K, Adkins DE, *et al.* (2013): Genes,  
739 Environments, and Developmental Research: Methods for a Multi-Site Study of Early Substance  
740 Abuse. *Twin Res Hum Genet* 16: 505–515.

- 741 10. Bisgaard H, Vissing NH, Carson CG, Bischoff AL, Følsgaard N V., Kreiner-Møller E, *et al.* (2013):  
742 Deep phenotyping of the unselected COPSAC<sub>2010</sub> birth cohort study. *Clin Exp Allergy* 43: 1384–  
743 1394.
- 744 11. Poulton R, Moffitt TE, Silva PA (2015): The Dunedin Multidisciplinary Health and Development  
745 Study: overview of the first 40 years, with an eye to the future. *Soc Psychiatry Psychiatr*  
746 *Epidemiol* 50: 679–693.
- 747 12. Moffitt TE (2002): Teen-aged mothers in contemporary Britain. *J Child Psychol Psychiatry* 43:  
748 727–742.
- 749 13. Kaprio J, Pulkkinen L, Rose RJ (2002): Genetic and Environmental Factors in Health-related  
750 Behaviors: Studies on Finnish Twins and Twin Families. *Twin Res* 5: 366–371.
- 751 14. Kaprio J (2006): Twin Studies in Finland 2006. *Twin Res Hum Genet* 9: 772–777.
- 752 15. Kaprio J (2013): The Finnish Twin Cohort Study: An Update. *Twin Res Hum Genet* 16: 157–162.
- 753 16. Pulkkinen L, Kaprio J, Rose RJ (1999): Peers, teachers and parents as assessors of the behavioural  
754 and emotional problems of twins and their adjustment: The multidimensional peer nomination  
755 inventory. *Twin Res* 2: 274–285.
- 756 17. Kooijman MN, Kruithof CJ, van Duijn CM, Duijts L, Franco OH, van IJzendoorn MH, *et al.* (2016):  
757 The Generation R Study: design and cohort update 2017. *Eur J Epidemiol* 31: 1243–1264.
- 758 18. Medina-Gomez C, Felix JF, Estrada K, Peters MJ, Herrera L, Kruithof CJ, *et al.* (2015): Challenges in  
759 conducting genome-wide association studies in highly admixed multi-ethnic populations: the  
760 Generation R Study. *Eur J Epidemiol* 30: 317–330.
- 761 19. Heinrich J, Bolte G, Hölscher B, Douwes J, Lehmann I, Fahlbusch B, *et al.* (2002): Allergens and  
762 endotoxin on mothers' mattresses and total immunoglobulin E in cord blood of neonates. *Eur*  
763 *Respir J* 20: 617–23.
- 764 20. Berg A v., Krämer U, Link E, Bollrath C, Heinrich J, Brockow I, *et al.* (2010): Impact of early feeding  
765 on childhood eczema: Development after nutritional intervention compared with the natural  
766 course - The GINIplus study up to the age of 6 years. *Clin Exp Allergy* 40: 627–636.

- 767 21. Copeland WE, Angold A, Shanahan L, Costello EJ (2014): Longitudinal Patterns of Anxiety From  
768 Childhood to Adulthood: The Great Smoky Mountains Study. *J Am Acad Child Adolesc*  
769 *Psychiatry* 53: 21–33.
- 770 22. Costello EJ, Angold A, Burns BJ, Stangl DK, Tweed DL, Erkanli A, Worthman CM (1996): The Great  
771 Smoky Mountains Study of Youth. *Arch Gen Psychiatry* 53: 1129.
- 772 23. Rhea S-A, Bricker JB, Wadsworth SJ, Corley RP (2013): The Colorado Adoption Project. *Twin Res*  
773 *Hum Genet* 16: 358–365.
- 774 24. Rhea S-A, Gross AA, Haberstick BC, Corley RP (2013): Colorado Twin Registry: An Update. *Twin*  
775 *Res Hum Genet* 16: 351–357.
- 776 25. Derringer J, Corley RP, Haberstick BC, Young SE, Demmitt BA, Howrigan DP, *et al.* (2015):  
777 Genome-Wide Association Study of Behavioral Disinhibition in a Selected Adolescent Sample.  
778 *Behav Genet* 45: 375–381.
- 779 26. Guxens M, Ballester F, Espada M, Fernández MF, Grimalt JO, Ibarluzea J, *et al.* (2012): Cohort  
780 Profile: The INMA—Infancia y Medio Ambiente—(Environment and Childhood) Project. *Int J*  
781 *Epidemiol* 41: 930–940.
- 782 27. Iacono WG, Carlson SR, Taylor J, Elkins IJ, McGue M (1999): Behavioral disinhibition and the  
783 development of substance-use disorders: Findings from the Minnesota Twin Family Study. *Dev*  
784 *Psychopathol* 11: 869–900.
- 785 28. Keyes MA, Malone SM, Elkins IJ, Legrand LN, McGue M, Iacono WG (2009): The Enrichment Study  
786 of the Minnesota Twin Family Study: Increasing the Yield of Twin Families at High Risk for  
787 Externalizing Psychopathology. *Twin Res Hum Genet* 12: 489–501.
- 788 29. Magnus P, Birke C, Vejrup K, Haugan A, Alsaker E, Daltveit AK, *et al.* (2016): Cohort Profile  
789 Update: The Norwegian Mother and Child Cohort Study (MoBa). *Int J Epidemiol* 45: 382–388.
- 790 30. Burt SA, Klump KL (2013): The Michigan State University Twin Registry (MSUTR): An Update. *Twin*  
791 *Res Hum Genet* 16: 344–350.
- 792 31. Keeping JD, Najman JM, Morrison J, Western JS, Andersen MJ, Williams GM (1989): A

- 793 prospective longitudinal study of social, psychological and obstetric factors in pregnancy:  
794 response rates and demographic characteristics of the 8556 respondents. *BJOG An Int J Obstet*  
795 *Gynaecol* 96: 289–297.
- 796 32. Najman JM, Alati R, Bor W, Clavarino A, Mamun A, McGrath JJ, *et al.* (2015): Cohort Profile  
797 Update: The Mater-University of Queensland Study of Pregnancy (MUSP). *Int J Epidemiol* 44:  
798 78-78f.
- 799 33. Najman J, Bor W, O’Callaghan M, Williams G, Aird R, Shuttlewood G (2005): Cohort Profile: The  
800 Mater-University of Queensland Study of Pregnancy (MUSP). *Int J Epidemiol* 34: 992–997.
- 801 34. Järvelin MR, Hartikainen-Sorri A-L, Rantakallio P (1993): Labour induction policy in hospitals of  
802 different levels of specialisation. *BJOG An Int J Obstet Gynaecol* 100: 310–315.
- 803 35. van Beijsterveldt CEM, Groen-Blokhuis M, Hottenga JJ, Franić S, Hudziak JJ, Lamb D, *et al.* (2013):  
804 The Young Netherlands Twin Register (YNTR): Longitudinal Twin and Family Studies in Over  
805 70,000 Children. *Twin Res Hum Genet* 16: 252–267.
- 806 36. Middeldorp CM, Hammerschlag AR, Ouwens KG, Groen-Blokhuis MM, St. Pourcain B, Greven CU,  
807 *et al.* (2016): A Genome-Wide Association Meta-Analysis of Attention-Deficit/Hyperactivity  
808 Disorder Symptoms in Population-Based Pediatric Cohorts. *J Am Acad Child Adolesc Psychiatry*  
809 55: 896-905.e6.
- 810 37. Kan K-J, Dolan C V., Nivard MG, Middeldorp CM, Van Beijsterveldt CEM, Willemsen G, Boomsma  
811 DI (2013): Genetic and environmental stability in attention problems across the lifespan:  
812 Evidence from the netherlands twin register. *J Am Acad Child Adolesc Psychiatry* 52: 12–25.
- 813 38. Scheet P, Ehli EA, Xiao X, van Beijsterveldt CEM, Abdellaoui A, Althoff RR, *et al.* (2012): Twins,  
814 Tissue, and Time: An Assessment of SNPs and CNVs. *Twin Res Hum Genet* 15: 737–745.
- 815 39. Newnham JP, Evans SF, Michael CA, Stanley FJ, Landau LI (1993): Effects of frequent ultrasound  
816 during pregnancy: a randomised controlled trial. *Lancet* 342: 887–891.
- 817 40. Straker L, Mountain J, Jacques A, White S, Smith A, Landau L, *et al.* (2017): Cohort Profile: The  
818 Western Australian Pregnancy Cohort (Raine) Study–Generation 2. *Int J Epidemiol* 46: dyw308.

- 819 41. Haworth CMA, Davis OSP, Plomin R (2013): Twins Early Development Study (TEDS): A Genetically  
820 Sensitive Investigation of Cognitive and Behavioral Development From Childhood to Young  
821 Adulthood. *Twin Res Hum Genet* 16: 117–125.
- 822 42. de Winter AF, Oldehinkel AJ, Veenstra R, Brunnekreef JA, Verhulst FC, Ormel J (2005): Evaluation  
823 of non-response bias in mental health determinants and outcomes in a large sample of pre-  
824 adolescents. *Eur J Epidemiol* 20: 173–181.
- 825 43. Oldehinkel AJ, Rosmalen JG, Buitelaar JK, Hoek HW, Ormel J, Raven D, *et al.* (2015): Cohort  
826 Profile Update: The TRacking Adolescents' Individual Lives Survey (TRAILS). *Int J Epidemiol* 44:  
827 76-76n.
- 828 44. Simonoff E, Pickles A, Meyer JM, Silberg JL, Maes HH, Loeber R, *et al.* (1997): The Virginia Twin  
829 Study of Adolescent Behavioral Development. *Arch Gen Psychiatry* 54: 801.
- 830 45. Hewitt JK, Rutter M, Simonoff E, Pickles A, Loeber R, Heath AC, *et al.* (1997): Genetics and  
831 Developmental Psychopathology: 1. Phenotypic Assessment in the Virginia Twin Study of  
832 Adolescent Behavioral Development. *J Child Psychol Psychiatry* 38: 943–963.
- 833 46. Eaves LJ, Silberg JL, Meyer JM, Maes HH, Simonoff E, Pickles A, *et al.* (1997): Genetics and  
834 Developmental Psychopathology: 2. The Main Effects of Genes and Environment on Behavioral  
835 Problems in the Virginia Twin Study of Adolescent Behavioral Development. *J Child Psychol*  
836 *Psychiatry* 38: 965–980.
- 837 47. Maes HH, Silberg JL, Neale MC, Eaves LJ (2007): Genetic and Cultural Transmission of Antisocial  
838 Behavior: An Extended Twin Parent Model. *Twin Res Hum Genet* 10: 136–150.
- 839
